# Supplementary material for: Validation of the Gaming Skills Questionnaire: Gaming Skills Effects on Cognitive and Affective Functioning in Adolescence
Source: Preprints.org preprint supplement (doi:10.20944/preprints202402.0768.v1), 2024-02-14
Supplement: Supplementary file 1 [file supplementary]

# GAMING SKILLS QUESTIONNAIRE (GSQ)

*Please, from 1 to 6, circle the response that better corresponds to your frequency of playing videogames and ability in playing videogames respectively.*

SPG-Frequency: How frequently do you play **Team Sports videogames** (e.g., FIFA, PES, NBA), **Racing videogames** (e.g., Need For Speed, Forza, Gran Turismo, Dirt, Trackmania), and/or **Fighting videogames** (e.g., Tekken, Street Fighter, Super Smash Bros, Mortal Kombat, Injustice, MultiVersus)?

1. Less than once a month
2. Around once a month
3. A few times a month
4. Around once a week
5. A few times a week
6. Everyday

SPG-Ability: How would you rate your ability in playing **Team Sports videogames** (e.g., FIFA, PES, NBA), **Racing videogames** (e.g., Need For Speed, Forza, Gran Turismo, Dirt, Trackmania), and/or **Fighting videogames** (e.g., Tekken, Street Fighter, Super Smash Bros, Mortal Kombat, Injustice, MultiVersus)?

1. No experience
2. Beginner Level
3. Somewhat Skilled
4. Skilled
5. Highly Skilled
6. Expert

FPSG-Frequency: How frequently do you play **First-person Shooter (FPS)** videogames (e.g., Call of Duty, Counter Strike, Valorant, Battlefield, Rainbow 6) and/or **Battle Royale** videogames (e.g., Fall/Stumble Guys, Fortnite, Free Fire, Apex, PUBG, CoD Warzone)?

1. Less than once a month
2. Around once a month
3. A few times a month
4. Around once a week
5. A few times a week
6. Everyday

FPSG-Ability: How would you rate your ability in playing **First-person Shooter (FPS)** videogames (e.g., Call of Duty, Counter Strike, Valorant, Battlefield, Rainbow 6) and/or **Battle Royale** videogames (e.g., Fall/Stumble Guys, Fortnite, Free Fire, Apex, PUBG, CoD Warzone)?

1. No experience
2. Beginner Level
3. Somewhat Skilled
4. Skilled
5. Highly Skilled
6. Expert

# GAMING SKILLS QUESTIONNAIRE (GSQ)

*Please, from 1 to 6, circle the response that better corresponds to your frequency of playing videogames and ability in playing videogames respectively.*

**RPG-Frequency:** How frequently do you play **Role Playing Games (RPG)** (e.g., Skyrim, Final Fantasy, Diablo, Witcher, Mass Effect, Fallout) and/or **Massively Multiplayer Online Role-Playing Games** (e.g., WOW, Elder Scrolls Online, EVE Online, Guild Wars, Black Desert, RuneScape)?

1. Less than once a month
2. Around once a month
3. A few times a month
4. Around once a week
5. A few times a week
6. Everyday

**RPG-Ability:** How would you rate your ability in playing **Role Playing Games (RPG)** (e.g., Skyrim, Final Fantasy, Diablo, Witcher, Mass Effect, Fallout) and/or **Massively Multiplayer Online Role-Playing Games** (e.g., WOW, Elder Scrolls Online, EVE Online, Guild Wars, Black Desert, RuneScape)?

1. No experience
2. Beginner Level
3. Somewhat Skilled
4. Skilled
5. Highly Skilled
6. Expert

**AAG-Frequency:** How frequently do you play **Action-Adventure videogames** (e.g., Pokémon, Zelda, Animal Crossing, Tomb Raider, Assassin's Creed)?

1. Less than once a month
2. Around once a month
3. A few times a month
4. Around once a week
5. A few times a week
6. Everyday

**AAG-Ability:** How would you rate your ability in playing **Action-Adventure videogames** (e.g., Pokémon, Zelda, Animal Crossing, Tomb Raider, Assassin's Creed)?

1. No experience
2. Beginner Level
3. Somewhat Skilled
4. Skilled
5. Highly Skilled
6. Expert

# GAMING SKILLS QUESTIONNAIRE (GSQ)

*Please, from 1 to 6, circle the response that better corresponds to your frequency of playing videogames and ability in playing videogames respectively.*

STG-Frequency: How frequently do you play **Strategy videogames** (e.g., Age of Empires, XCOM, Endless, StarCraft, Civilization, Total War)?

1. Less than once a month
2. Around once a month
3. A few times a month
4. Around once a week
5. A few times a week
6. Everyday

STG-Ability: How would you rate your ability in playing **Strategy videogames** (e.g., Age of Empires, XCOM, Endless, Starcraft, Civilization, Total War)?

1. No experience
2. Beginner Level
3. Somewhat Skilled
4. Skilled
5. Highly Skilled
6. Expert

PSG-Frequency: How frequently do you play **Puzzle videogames** (e.g., Portal, Stray, Unravel, Inside)?

1. Less than once a month
2. Around once a month
3. A few times a month
4. Around once a week
5. A few times a week
6. Everyday

PSG-Ability: How would you rate your ability in playing **Puzzle videogames** (e.g., Portal, Stray, Unravel, Inside)?

1. No experience
2. Beginner Level
3. Somewhat Skilled
4. Skilled
5. Highly Skilled
6. Expert

# GAMING SKILLS QUESTIONNAIRE (GSQ)

## Skills' Scores per Game Genre and Total Gaming Skill Score

|                                             | <i>Frequency</i> | <i>Ability</i> | <b>Skill Score</b> |
|---------------------------------------------|------------------|----------------|--------------------|
| Sports Games ( <i>SPG</i> )                 |                  |                |                    |
| First-Person Shooting Games ( <i>FPSG</i> ) |                  |                |                    |
| Role-Playing Games ( <i>RPG</i> )           |                  |                |                    |
| Action-Adventure Games ( <i>AAG</i> )       |                  |                |                    |
| Strategy Games ( <i>STG</i> )               |                  |                |                    |
| Puzzle Solving Games ( <i>PSG</i> )         |                  |                |                    |
| <b>Total Gaming Skill Score =</b>           |                  |                |                    |

Skill Score = Frequency + Ability

Total Gaming Skill Score = The sum of Skill Scores
